# Supplementary material for: A Modified Method for Whole Exome Resequencing from Minimal Amounts of Starting DNA
Source: PubMed Central journal article supplement (PMC3293839; doi:10.1371/journal.pone.0032617), 2012-03-05
Supplement: pone.0032617.s001.pdf [file pone.0032617.s001.pdf]

## Methods S1

### Minimal Starting Amount Sample Preparation Protocol (MSA-Cap)

#### 1. Methods.

##### 1.1. Fragmentation.

- Start from 50-60 ng DNA in 10-30  $\mu$ l Elution buffer (EB) or TE buffer (10mM Tris, pH 7.5/ 1 mM EDTA).
- Add EB buffer to make the final volume of 75 $\mu$ l.
- Transfer the samples to 130 $\mu$ l Crimp-Cap microTUBE with AFA fiber.
- Shear the samples for 140 sec with the following program:
  - Duty cycle: 20%
  - Intensity: 5
  - Cycle burst: 200
  - Power: 37W
  - Temperature: 7°C
  - Mode: freq sweeping
- Transfer the samples into 1.5 ml RNase-free non-stick tubes.
- Check the quality of fragmentation by running the samples on an Agilent High Sensitivity DNA chip. A 150-250 bp smear should be detected with 70-90% of the initial DNA amount recovered.

PAUSE POINT: fragmented samples can be stored at -20°C for up to 4 weeks.

### 1.2. End-repair.

- For each sample, prepare the following master mix from the NEBNext DNA Sample Prep Reagent Set 1 with 10% excess for pipetting errors:

|            |                                   |
|------------|-----------------------------------|
| 10 $\mu$ l | Phosphorylation buffer            |
| 4 $\mu$ l  | 10 mM dNTP mix                    |
| 5 $\mu$ l  | 3U/ $\mu$ l T4 DNA polymerase     |
| 1 $\mu$ l  | 5U/ $\mu$ l Klenow DNA polymerase |
| 5 $\mu$ l  | 10U/ $\mu$ l T4 PNK               |

- Mix and aliquot 25  $\mu$ l of master mix into each sample tube containing 75  $\mu$ l of sheared DNA. Mix well by pipetting up and down.
- Incubate for 30 minutes in a thermal cycler at 20°C. Switch off heated lid.
- Purify end-repaired DNA using a Zymo DNA Clean & Concentrator™-5 column following the manufacturer's instructions and using 5:1 ratio of DNA Binding Buffer: sample volume.
- Elute DNA in 33  $\mu$ l EB pre-heated to 50°C.

PAUSE POINT: end-repaired samples can be stored at -20°C for couple of days.

### 1.3. A-tailing.

- For each sample, prepare the following master mix from the NEBNext DNA Sample Prep Reagent Set 1 kit with a 10% excess:

|            |                                                  |
|------------|--------------------------------------------------|
| 5 $\mu$ l  | 10x NEB buffer 2                                 |
| 10 $\mu$ l | 1 mM dATP                                        |
| 3 $\mu$ l  | 5U/ $\mu$ l Klenow fragment (3' to 5' exo minus) |

- Aliquot 18  $\mu\text{l}$  of mix to each sample and mix well by pipetting.
- Incubate at 37°C for 30 minutes in a thermal cycler with the heated lid set at 37°C  $\pm$ 5°C.
- Purify the A-tailed DNA using a Zymo DNA Clean & Concentrator™-5 column following the manufacturer's instructions and using 5:1 ratio of DNA Binding Buffer : sample volume.
- Elute DNA in 12  $\mu\text{l}$  EB pre-heated to 50°C.
- Check the quantity of the recovered A-tailed samples by running them on an Agilent High Sensitivity DNA chip. Use the 'Region' function to calculate the DNA quantity in ng/ $\mu\text{l}$ .

#### 1.4. Ligation.

- Using the formula below, calculate the moles A-tailed samples. Use a molar ratio of 20:1 of adapters: A-tailed sample. The adapters are prepared as described in Appendix 1.

$$\text{Moles} = \frac{\text{DNA mass in g}}{\text{average length of the fragmented DNA} \times 650 \text{ (average weight of a base pair)}}$$

- For each sample, prepare the following master mix with a 10% excess:

|                    |                                                                |
|--------------------|----------------------------------------------------------------|
| 25 $\mu\text{l}$   | 2x quick ligation buffer (from the NEB kit)                    |
| x $\mu\text{l}$    | Adapter mix (1:10 dilution in T4 ligase buffer with 10mM ATP)* |
| 10-x $\mu\text{l}$ | Water                                                          |

5μl      2000U/μl T4 DNA ligase

40μl      TOTAL

\*The volume adapters required for 20:1 adapter: sample ratio.

The adapter mix is prepared as described in Appendix 1.

- Mix and add 40 μl of mix to sample (total volume 50 μl).
- Incubate at 20°C for 25 minutes.
- Purify the samples using AMPure SPRI beads (see Appendix 2). Elute the samples in 96ul nuclease-free water.

PAUSE POINT: purified or unpurified ligations can be stored at -20°C for up to 1 week.

### 1.5. Pre-hybridization PCR.

- For each sample, prepare the following master mix, plus a 10% excess:

4 μl              25 μM primer PE2.1

4 μl              25 μM primer PE2.2

100 μl            2x Phusion HF master mix

92 μl              ligated sample

- You will need to use the entire ligated product. Check whether the volume is 92 μl and adjust to 92 μl accordingly.
- Aliquot each sample into 4 0.2ml thin wall PCR tubes (50 μl in each) and perform the following cycling conditions.

98°C for 2 minutes

8 cycles of:      98°C for 20 seconds  
                         65°C for 30 seconds  
                         72°C for 30 seconds  
Then                72°C for 5 minutes  
                         4°C indefinitely

- Purify the PCR product using AMPure SPRI beads as described in Appendix 2, except:
  - Combine all 4 PCRs into one tube and add 360  $\mu$ l beads.
  - Elute DNA in 40  $\mu$ l nuclease-free water.
- Check the quantity of the libraries obtained by running them on an Agilent High Sensitivity DNA chip. Use the 'Region' function to calculate the DNA quantity in ng/ $\mu$ l.

PAUSE POINT: purified or unpurified PCR reactions can be stored at -20°C for up to 6 weeks.

- Separate 250 ng of DNA library to a 1.5 ml RNase-free non-stick tube.
- Vacuum dry the samples at <45°C until dry.
- Resuspend the samples in 3.4  $\mu$ l nuclease-free water overnight at 22°C.

## 1.6. Hybridisation

### 1.6.1. Preparation step.

- **A – Hybridisation Buffer**

Mix the components below (from the Agilent SureSelect kit) at room temperature to prepare the hybridization buffer:

| <b>Reagent</b>    | <b>x1</b>                  | <b>x12</b>                  |
|-------------------|----------------------------|-----------------------------|
| SureSelect Hyb #1 | 25 $\mu$ l                 | 275 $\mu$ l                 |
| SureSelect Hyb #2 | 1 $\mu$ l                  | 11 $\mu$ l                  |
| SureSelect Hyb #3 | 10 $\mu$ l                 | 110 $\mu$ l                 |
| SureSelect Hyb #4 | 13 $\mu$ l                 | 143 $\mu$ l                 |
| <b>Total</b>      | <b>49<math>\mu</math>l</b> | <b>539<math>\mu</math>l</b> |

If a precipitate forms warm the buffer at 65°C for 5 minutes.

- **B – Library Preparation**

In 0.2 ml PCR thin wall strip tubes prepare the following:

|             |                                    |
|-------------|------------------------------------|
| 3.4 $\mu$ l | 250ng DNA library                  |
| 2.5 $\mu$ l | SureSelect block #1 (green cap)    |
| 2.5 $\mu$ l | SureSelect block #2 (blue cap)     |
| 0.6 $\mu$ l | SureSelect PE block #3 (brown cap) |

Mix by pipetting.

- **C – Oligo Library Capture Mix**

In 0.2 ml thin wall PCR strip tubes prepare the following:

|           |                                                |
|-----------|------------------------------------------------|
| 5 $\mu$ l | SureSelect Oligo Capture library               |
| 1 $\mu$ l | Nuclease-free water                            |
| 1 $\mu$ l | RNase block (purple cap, diluted 1:1 in water) |

Place in fridge until ready to use.

### 1.6.2. Hybridization step.

Set a thermal cycler to the following temperatures with heated lid at 105°C:

95°C      5 minutes

65°C      indefinitely

- Place empty 0.2 ml strip tubes at either end of the PCR machine to prevent crushing tubes with samples in by the heated lid.
- Place the library preps (B) into column 3 and heat the samples to 95°C for 5 minutes followed by 65°C forever.
- Place the strip tubes labelled A in the PCR machine into column 2 and pipette 40 µl of Hybridisation buffer (A above) into each tube per sample.
- Incubate at 65°C for 5 minutes.
- Keeping the tubes in the PCR machine, place the library capture mix (C) in column 4 and heat at 65°C for 2 minutes.
- In the PCR machine transfer 13 µl of A (hyb buffer) to C (capture mix). Then transfer 9 µl of DNA library (B) to C (hyb+capture).
- Transfer entire contents of C (hyb+capture+library) to new 0.2 ml tubes, cap and incubate at 65°C for 24 hours with the heated lid at 105°C. Keep used strips either side of samples to prevent crushing of tubes.

## 1.7. Capture of the hybridized exome regions.

### 1.7.1 Magnetic Bead Preparation.

- Pre-warm SureSelect Wash Buffer #2 from the Agilent SureSelect kit at 65°C.

- Resuspend MyOne Streptavidin T1 Dynabeads and for each sample separate 50  $\mu$ l to a 1.5 ml Eppendorf tube.
- Add 200  $\mu$ l SureSelect binding buffer to each tube and mix by vortexing.
- Place the tube in a magnet and remove and discard the supernatant.
- Repeat wash with binding buffer for a total of 3 washes.
- Resuspend the beads in 200  $\mu$ l SureSelect Binding buffer.

### **1.7.2 Hybrid Capture.**

- Estimate and record the volume of each sample remaining after the 24 hour hybridisation.
- Add the hybridization mixture directly from the thermal cycler to the bead slurry and invert 3-5 times.
- Incubate the mixture on a rotator for 30 minutes at room temperature, ensuring the sample is mixing properly.
- Briefly centrifuge, place on a magnet stand and remove the supernatant.
- Add 500  $\mu$ l SureSelect Wash Buffer #1 and vortex.
- Incubate beads at room temperature for 15 minutes.
- Place on a magnet, remove supernatant and add 500  $\mu$ l pre-warmed at 65°C Wash Buffer #2 (1.6.1.) and vortex.
- Incubate at 65°C for 10 minutes.
- Place tube on magnet, remove supernatant and repeat wash with buffer #2 for a total of 3 washes.
- Ensure all buffer has been removed from beads.
- Mix the beads with 50  $\mu$ l SureSelect Elution buffer by vortexing.



- Incubate at room temperature for 10 minutes.
- Place tube on magnet and transfer supernatant to a new 1.5 ml tube. The supernatant contains the captured DNA and the beads can be discarded.
- Add 50  $\mu$ l SureSelect Neutralization buffer to the captured DNA.
- Purify the captured DNA using a Zymo column following the manufacturer's instructions and using 5:1 ratio of DNA Binding Buffer: sample volume.
- Elute DNA in 17  $\mu$ l EB pre-heated to 50°C.

PAUSE POINT: purified captured DNA samples can be stored at -20°C for up to 1 week.

### 1.8. Post-hybridization PCR.

- Prepare one amplification reaction per sample, and include a negative control.

|                                  |                               |
|----------------------------------|-------------------------------|
| Nuclease-free water              | 22.5 $\mu$ l                  |
| 5X Herculase II buffer           | 10.0 $\mu$ l                  |
| dNTP mix (25 mM each)            | 0.5 $\mu$ l                   |
| Herculase II Fusion DNA Pol      | 1.0 $\mu$ l                   |
| <u>SureSelect GA PCR primers</u> | <u>1.0<math>\mu</math>l</u>   |
| <b>Total</b>                     | <b>35.0 <math>\mu</math>l</b> |

- Add 35  $\mu$ l of the master mix to each 15  $\mu$ l library in 0.2 ml PCR tubes.
- Run the following PCR program:
  - 98°C for 2 minutes
  - 8 cycles of:
    - 98°C for 20 seconds
    - 60°C for 30 seconds

72°C for 30seconds

Then:               72°C for 5 minutes

4°C indefinitely

- Purify the PCR reaction using AMPure SPRI beads as in Appendix 2.
- Elute in 60 µl nuclease-free water.
- Assess the quantity of the final sequencing library using a High sensitivity DNA Bioanalyzer chip.

PAUSE POINT: the ready for sequencing libraries can be stored at -20°C for up to 6 months.

### 1.9. Flowcell preparation.

- Final sequencing libraries were adjusted to 1nM and denatured in 0.5N NaOH.

|                 |                          |
|-----------------|--------------------------|
| xµl*            | Final sequencing library |
| 1µl             | 2N NaOH                  |
| <u>19ul-Xµl</u> | <u>EB</u>                |
| 20µl            | Total volume             |

\*x is the volume of sample required to give 1nM molarity in 20µl.

- Libraries were incubated at room temperature for 5 minutes to denature.
- Dilution and remaining flowcell preparation were carried out according to manufacturer's protocol for Paired-End Cluster Generation Kit v4 (Illumina).

## 2. Timing:

|                                                  |                       |
|--------------------------------------------------|-----------------------|
| 1. Sample fragmentation.                         | 10 minutes per sample |
| 2. End-repair, A-tailing and ligation.           | 6 hours               |
| 3. AMPure SPRI-beads purification.               | 50 minutes            |
| 4. Pre-hybridization and post-hybridization PCR. |                       |
| 4.1. Set up                                      | 0.5 hour              |
| 4.2. PCR                                         | 0.5 hours             |
| 4.3. Clean up                                    | 40 minutes            |
| 5. Hybridization.                                |                       |
| 5.1. Set up                                      | 1 hour                |
| 5.2. Duration                                    | 24 hours              |
| 6. Capture of the exome regions.                 |                       |
| 6.1. Magnetic Bead Preparation                   | 0.5 hour              |
| 6.2. Hybrid Capture                              | 4 hours               |
| 7. Flowcell preparation                          | 1 hour                |

## 3. Consumables.

- SureSelect Human All Exon Kit (Agilent Technologies UK, Edinburgh, UK, cat. no. G3362B)

- Human All Exon 50Mb Kit (Agilent Technologies UK, Edinburgh, UK, cat. no. G3370B)
- Agencourt AMPure SPRI beads (Beckman Coulter, Brea, CA cat. no A29152 )
- QIAquick PCR purification kit (Qiagen, Valencia, CA cat. no. 28104)
- HPLC-purified indexing adapters (Sigma, St.Louis, MO)
- Crimp-Cap microTUBE with AFA fiber (Covaris, Woburn, MA cat. no. 520052)
- Agilent High Sensitivity DNA chip (Agilent Technologies UK, Edinburgh, UK, cat. no. 5067-4626)
- Agilent DNA 1000 chips (Agilent Technologies UK, Edinburgh, UK, CA cat. no. 5067-1504)
- RNase-free non-stick tubes 1.5ml (Applied Biosystems/Ambion, Austin, TX, cat. no. AM12450)
- DNA Clean & Concentrator™-5 (Zymo Research, Irvine, CA cat. No.D4013)
- 0.2ml Thin Wall Clear PCR Strip Tubes and Clear Strip Caps. (Axygen, Union City, CA PCR-0208-CP-C)
- NEBNext DNA Sample Prep Reagent Set 1 (NEB, Hitchin, Herts, UK cat. no. E6000S)
- Phusion® High-Fidelity PCR Master Mix with HF Buffer (Finnzymes Oy, Vantaa, Finland, cat. no.F-531S)
- Dynabeads MyOne Streptavidin T1 (Life Technologies Ltd, Paisley , UK cat. no. 656-01)
- Paired-End Cluster Generation Kit v4 (Illumina Inc, San Diego, CA, USA, cat. no. PE-203-4005)
- HPLC-purified Adapters (Sigma, St.Louis, MO)

Top\_adapter        5' ACACTCTTCCCTACACGACGCTCTTCCGATC\*T 3'

\*indicates phosphorothioate

Bottom\_adapter    5' GATCGGAAGAGCGGTTCAGCAGGAATGCCGAG 3'

- HPLC-purified pre-hybridization PCR primers (Sigma, St.Louis, MO)

PE2.1 5'AATGATACGGCGACCACCGAGATCTACACTCTTCCCTACACGACGCTCTTCCGATC\*T

PE2.2

5'CAAGCAGAAGACGGCATAACGAGAT CGGTCTCGGCATTCTGCTGAACCGCTCTTCCGATC\*T 3'

\*indicates phosphorothioate

## 5. Appendix 1.

- Resuspend adapter oligos to a final concentration of 100  $\mu$ M in water.
- Combine the following in one 0.2ml thin wall PCR tube:

|                                |            |
|--------------------------------|------------|
| 100 $\mu$ M Top_adapter        | 20 $\mu$ l |
| 100 $\mu$ M Bottom_adapter     | 20 $\mu$ l |
| T4 ligase buffer with 10mM ATP | 5 $\mu$ l  |
| T4 PNK                         | 5 $\mu$ l  |

- Vortex, spin and place the tube in the thermal cycler.

- Use the following cycling conditions:

30 minutes at 37°C

Ramp PCR machine at 0.5°C / sec to 97.5°C

Hold at 97.5°C for 150 seconds

Then 97.5°C for 5 seconds and temp drop of (-) 0.1°C per cycle for 775 cycles (i.e. decrease temperature from 97.5°C by 0.1°C every 5 seconds).

4°C indefinite

- Store at -20°C in 8µl aliquots.

## 6. Appendix 2.

### **AMPure SPRI beads purification.**

Allow SPRI beads to come to room temperature for at least 30 minutes. Reagents need to be mixed well prior to use and should appear homogeneous and consistent in colour.

- Add the required volume of SPRI beads to the required volume sample (unless otherwise stated 90µl beads: 50µl sample) in a 1.5 ml Eppendorf tube.
- Vortex and leave at room temperature for 5 minutes.
- Place tubes in a magnetic rack.
- Leave for 5 minutes or until sample is clear.
- Carefully remove the clear solution from the tubes and discard.
- Dispense 500µl of 70% ethanol (fresh, not more than 2 days old) into each tube while in the magnetic rack taking care not to disturb the magnetic beads. Aspirate and discard ethanol.
- Repeat the ethanol wash once again (for total of two washes).
- Dry the samples on a heat block (keep the lid of the tube open) at 37°C for 5 to 10 minutes or until the residual ethanol has evaporated (cracks appear in the samples).

- Add specified  $\mu\text{l}$  of nuclease free water, vortex and incubate at room temperature for 2 minutes.
- Place tubes into the magnetic rack and leave for 2-3 minutes or until sample is clear.
- Carefully remove the water and retain in a new 1.5ml low bind Eppendorf tube.

## 7. Appendix 3.

**Comparison of time requirements for performing the Standard Amount (SA) library preparation method and the Minimal Starting Amount Capture (MSA-Cap) library preparation method. All time estimations were based on processing 8 samples with single channel pipette.**

| <b>Step</b>                                                                                     | <b>SA Method</b> | <b>MSA-Cap Method</b> |
|-------------------------------------------------------------------------------------------------|------------------|-----------------------|
| <b>Sample fragmentation</b>                                                                     | 1 hour           | 1 hour                |
| <b>End-repair, A-tailing and Ligation<br/>(including purifications and quality assessments)</b> | 6.5 hours        | 5 hours               |
| <b>Pre-hybridization PCR</b>                                                                    | 1.5 hours        | 1.5 hours             |
| <b>Library Hybridization</b>                                                                    | 25 hours         | 25 hours              |
| <b>Isolation of exomic DNA</b>                                                                  | 3 hours          | 2.5 hours             |

|                                                     |           |           |
|-----------------------------------------------------|-----------|-----------|
| <b>Post-hybridization PCR</b>                       | 1.5 hours | 1.5 hours |
| <b>Bioanalyzer and qPCR quantity<br/>assessment</b> | 3.5 hours | 3.5 hours |
| <b>Flowcell preparation</b>                         | 2 hours   | 2 hours   |

---
