# Supplementary material for: A Modified Method for Whole Exome Resequencing from Minimal Amounts of Starting DNA
Source: PubMed Central journal article supplement (PMC3293839; doi:10.1371/journal.pone.0032617), 2012-03-05

Figure S1.

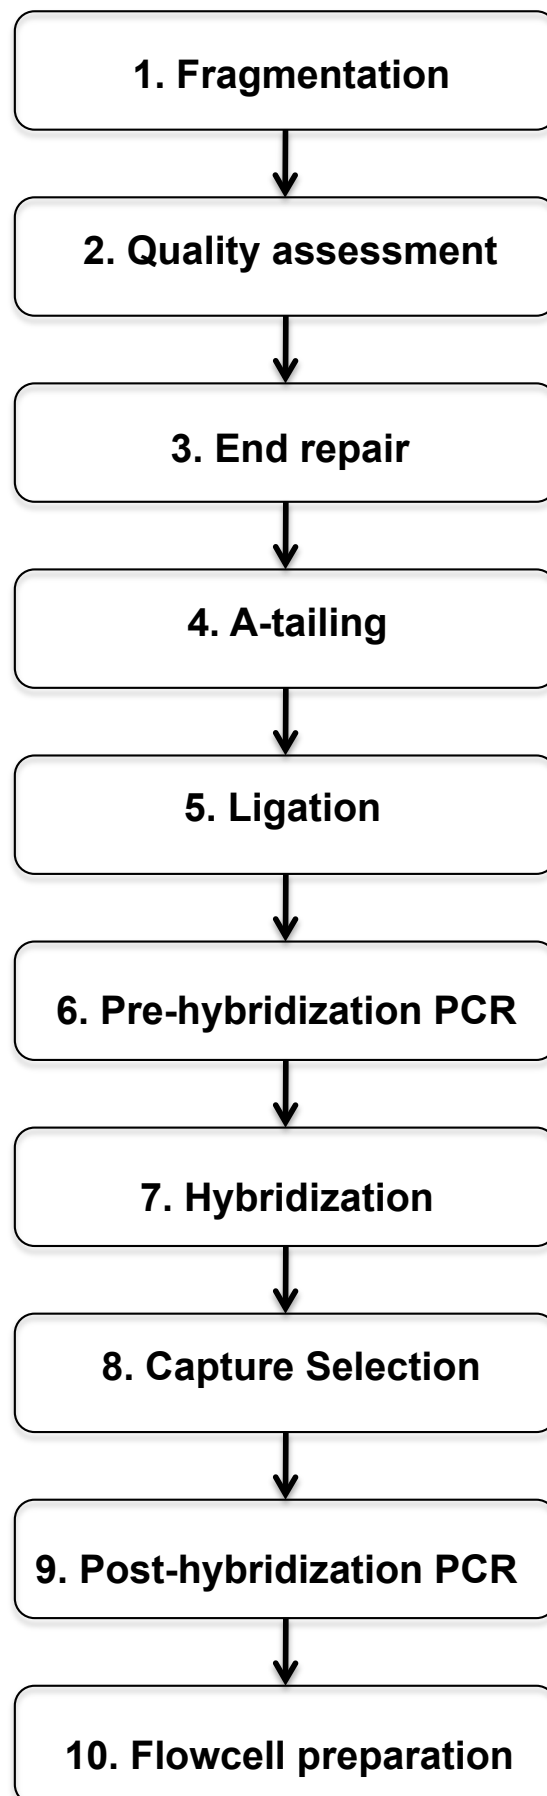

Supplement: pone.0032617.s002.pdf [file pone.0032617.s002.pdf]
