# Supplementary material for: A Modified Method for Whole Exome Resequencing from Minimal Amounts of Starting DNA
Source: PubMed Central journal article supplement (PMC3293839; doi:10.1371/journal.pone.0032617), 2012-03-05
Supplement: pone.0032617.s003.pdf [file pone.0032617.s003.pdf]

Figure S2.

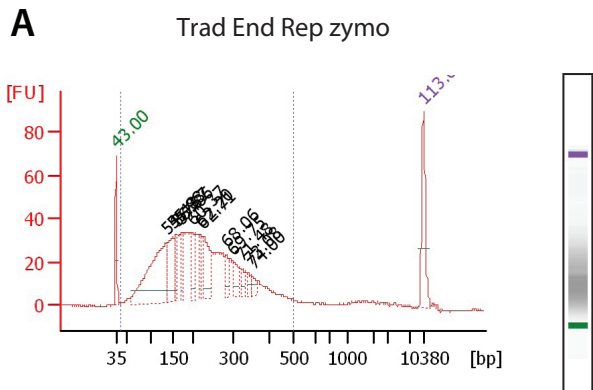

Overall Results for sample 3 : Trad End Rep zymo

Number of peaks found: 12  
 Noise: 0.1  
 Corr. Area 1: 1,225.2

Region table for sample 3 : Trad End Rep zymo

| From [bp] | To [bp] | Corr. Area | % of Total | Average Size [bp] | Size distribution in CV [%] | Conc. [pg/μl] | Molarity [pmol/l] | Color |
|-----------|---------|------------|------------|-------------------|-----------------------------|---------------|-------------------|-------|
| 1         | 43      | 43         | 3.5        | 43                | 100                         | 12            | 0.1               | Blue  |

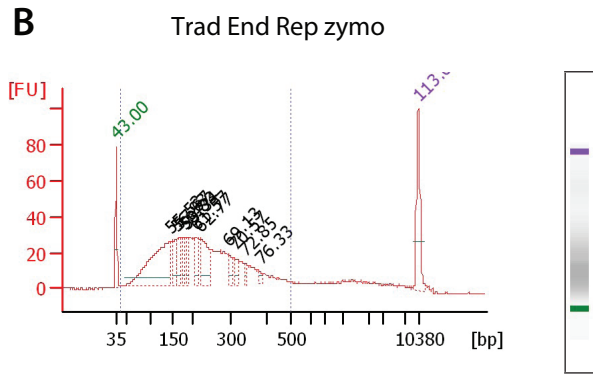

Overall Results for sample 4 : Trad End Rep zymo

Number of peaks found: 11  
 Noise: 0.2  
 Corr. Area 1: 1,111.2

Region table for sample 4 : Trad End Rep zymo

| From [bp] | To [bp] | Corr. Area | % of Total | Average Size [bp] | Size distribution in CV [%] | Conc. [pg/μl] | Molarity [pmol/l] | Color |
|-----------|---------|------------|------------|-------------------|-----------------------------|---------------|-------------------|-------|
| 1         | 43      | 43         | 3.8        | 43                | 100                         | 11            | 0.2               | Blue  |

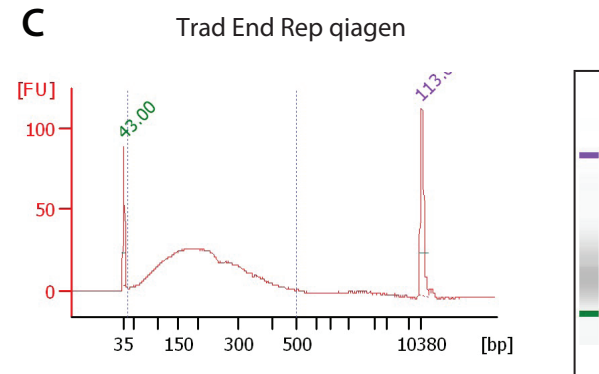

Overall Results for sample 5 : Trad End Rep qiagen

Number of peaks found: 0  
 Noise: 0.2  
 Corr. Area 1: 977.6

Region table for sample 5 : Trad End Rep qiagen

| From [bp] | To [bp] | Corr. Area | % of Total | Average Size [bp] | Size distribution in CV [%] | Conc. [pg/μl] | Molarity [pmol/l] | Color |
|-----------|---------|------------|------------|-------------------|-----------------------------|---------------|-------------------|-------|
| 1         | 43      | 43         | 0          | 43                | 100                         | 0             | 0.2               | Blue  |
