# Supplementary material for: A Modified Method for Whole Exome Resequencing from Minimal Amounts of Starting DNA
Source: PubMed Central journal article supplement (PMC3293839; doi:10.1371/journal.pone.0032617), 2012-03-05
Supplement: pone.0032617.s004.pdf [file pone.0032617.s004.pdf]

Table S1

|                       | PCL      |         | PCL-buccal Swab |         | NA12813 |         |
|-----------------------|----------|---------|-----------------|---------|---------|---------|
|                       | SA       | MSA-Cap | SA              | MSA-Cap | SA      | MSA-Cap |
| <b>Mappable yield</b> | 10.06 Gb | 9.43 Gb | 10.09Gb         | 10.26Gb | 7.96 Gb | 9.31 Gb |
| <b>Insert size</b>    | 158      | 167     | 140             | 172     | 157     | 167     |
| <b>% PF clusters</b>  | 91%      | 90%     | 87%             | 90%     | 89%     | 91%     |
| <b>% Align (PF)</b>   | 99%      | 99%     | 99%             | 99%     | 98%     | 98%     |
